# Supplementary material
Source: Springer Nature journal article supplement (https://www.springermedizin.de/resource/supplementary/12890_2013_544_MOESM5_ESM.pdf/9505278)

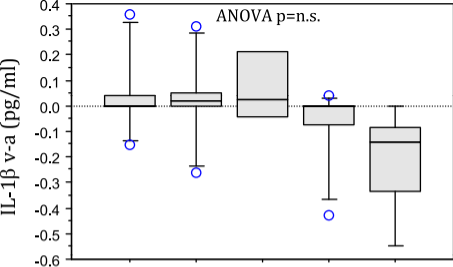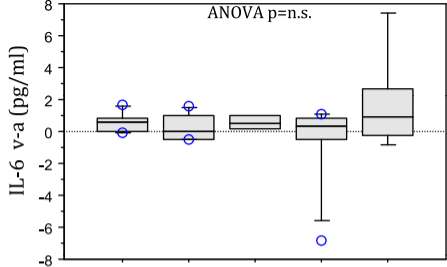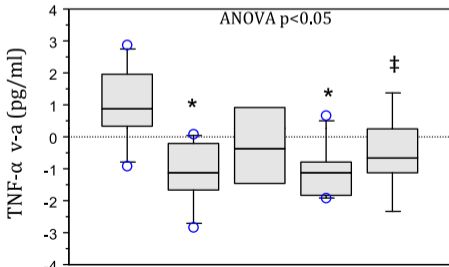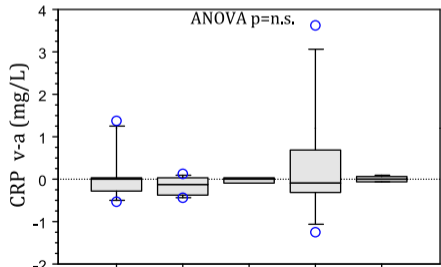

AATD AATD AATD COPD Healthy  
+AUG -AUG PFTnorm

AATD AATD AATD COPD Healthy  
+AUG -AUG PFTnorm

Supplement: MOESM5 [file 9505278]
